# Supplementary material
Source: Royal Society of Chemistry journal article supplement (doi:10.1039/d5ta10299e)
Supplement: d5ta10299e1.pdf [file d5ta10299e1.pdf]

## Supporting information

### Generating green hydrogen via nickel sulfide modified titania thin film photocatalysts

Melissa Sophie Egger,<sup>a</sup> Stephen Nagaraju Myakala,<sup>b</sup> Marco Sigl,<sup>a</sup> Georg Haberfehlner,<sup>c</sup> Manfred Nachtnebel,<sup>d</sup> Anto Vrbat,<sup>e</sup> Thomas Griesser,<sup>e</sup> Alaaddin Cem Ok,<sup>b,f</sup> Alexey Cherevan,<sup>b</sup> Dominik Eder,<sup>b</sup> Thomas Rath,<sup>a,\*</sup> Gregor Trimmel<sup>a,\*</sup>

<sup>a</sup> Institute for Chemistry and Technology of Materials (ICTM), NAWI Graz, Graz University of Technology, Stremayrgasse 9, 8010 Graz, Austria

<sup>b</sup> Institute of Materials Chemistry, Technical University Vienna, Getreidemarkt 9, 1060 Vienna, Austria

<sup>c</sup> Institute of Electron Microscopy and Nanoanalysis (FELMI), Graz University of Technology, Steyrergasse 17, 8010 Graz, Austria

<sup>d</sup> Graz Centre for Electron Microscopy (ZFE), Steyrergasse 17, 8010 Graz, Austria

<sup>e</sup> Institute of Chemistry of Polymeric Materials, Montanuniversität Leoben, Otto-Glöckel-Straße 2, 8700 Leoben, Austria

<sup>f</sup> Department of Metallurgical and Materials Engineering, Faculty of Engineering, Marmara University, TR-34722 Istanbul, Turkey

\* Corresponding author email address: gregor.trimmel@tugraz.at, thomas.rath@tugraz.at

## X-Ray diffraction (XRD)

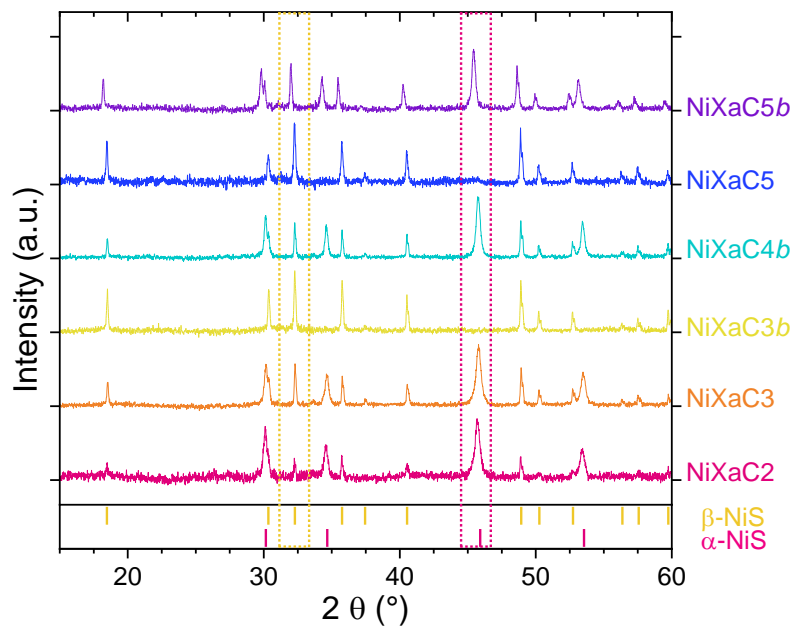

**Figure S1** XRD diffractograms of NiS thin films sintered at 400°C

## Scanning transmission electron microscopy (STEM)

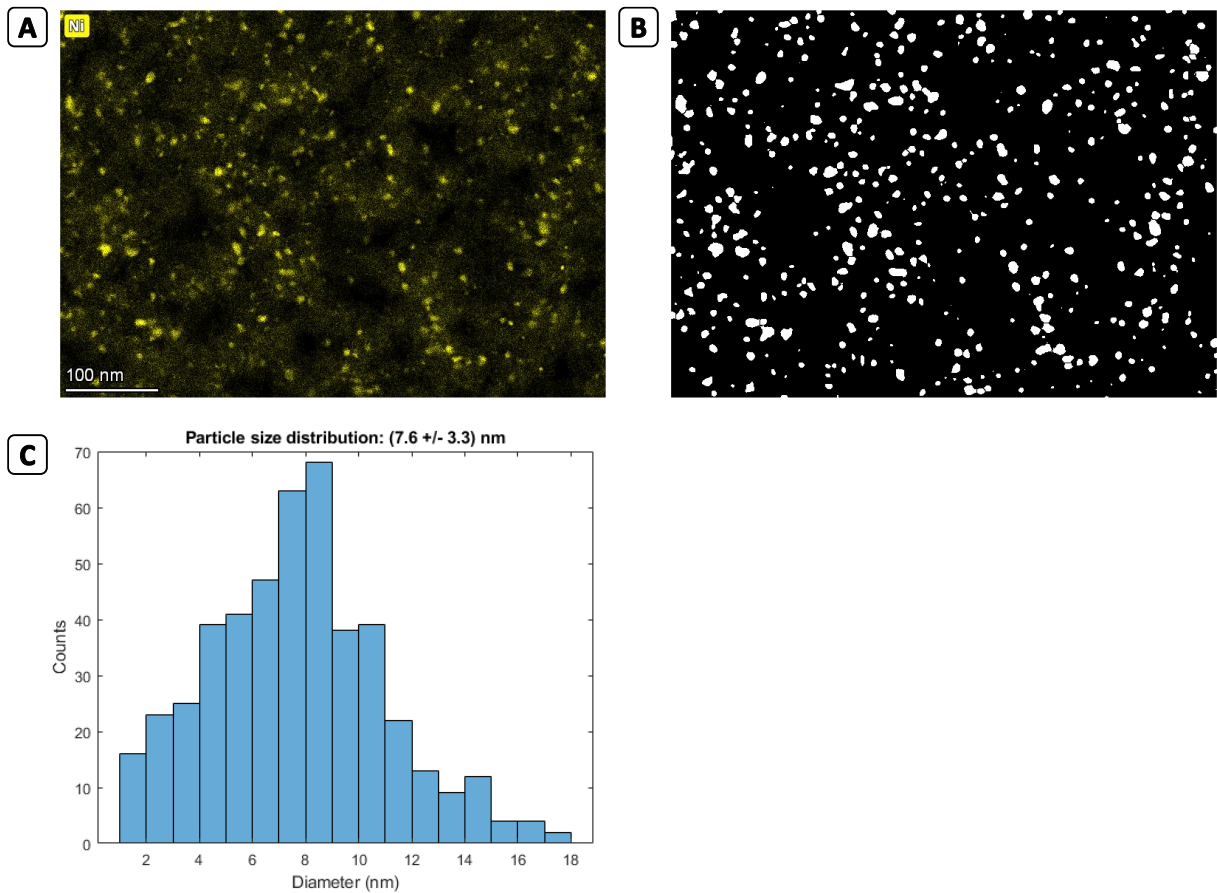

**Figure S2** Particle size distribution for nickel sulfide. (A) EDS elemental map of nickel. (B) segmentation of the nickel map. (C) particle size distribution.

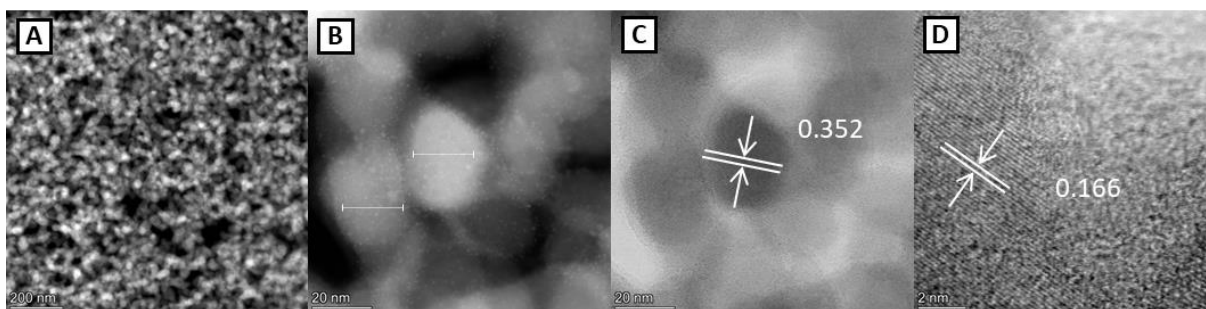

**Figure S3** (A, B): HAADF-STEM images of the sample cross section at two different magnifications. In (B), crystallites in the range of approximately 25 nm can be observed. The small, bright spots located on the surface of the titania particles are small atomic clusters of Pt, which stem from redeposition of the Pt used in the sample preparation. (C, D): BF images at two different magnifications with the interplanar spacings of the observed anatase ((101), 0.352 nm) and ((105), 0.166 nm) planes marked.

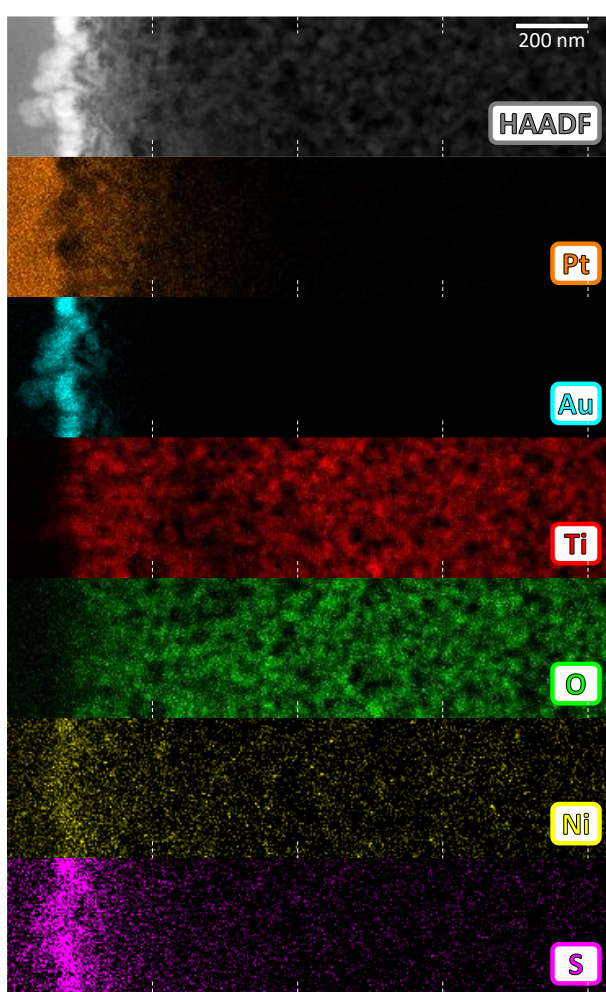

**Figure S4** HAADF-STEM image and EDS elemental maps of the sample cross-section starting at the protection layer of gold and platinum on the sample surface. Platinum (orange), gold (light blue), titanium (red), oxygen (green), nickel (yellow), sulfur (pink)

The area of the elemental mapping (Figure S4, area indicated by a rectangle in Figure 4A in the main manuscript) shows the region from the sample surface to approx. 1  $\mu\text{m}$  inside the film.

## UV-Vis: Titania film thickness determination

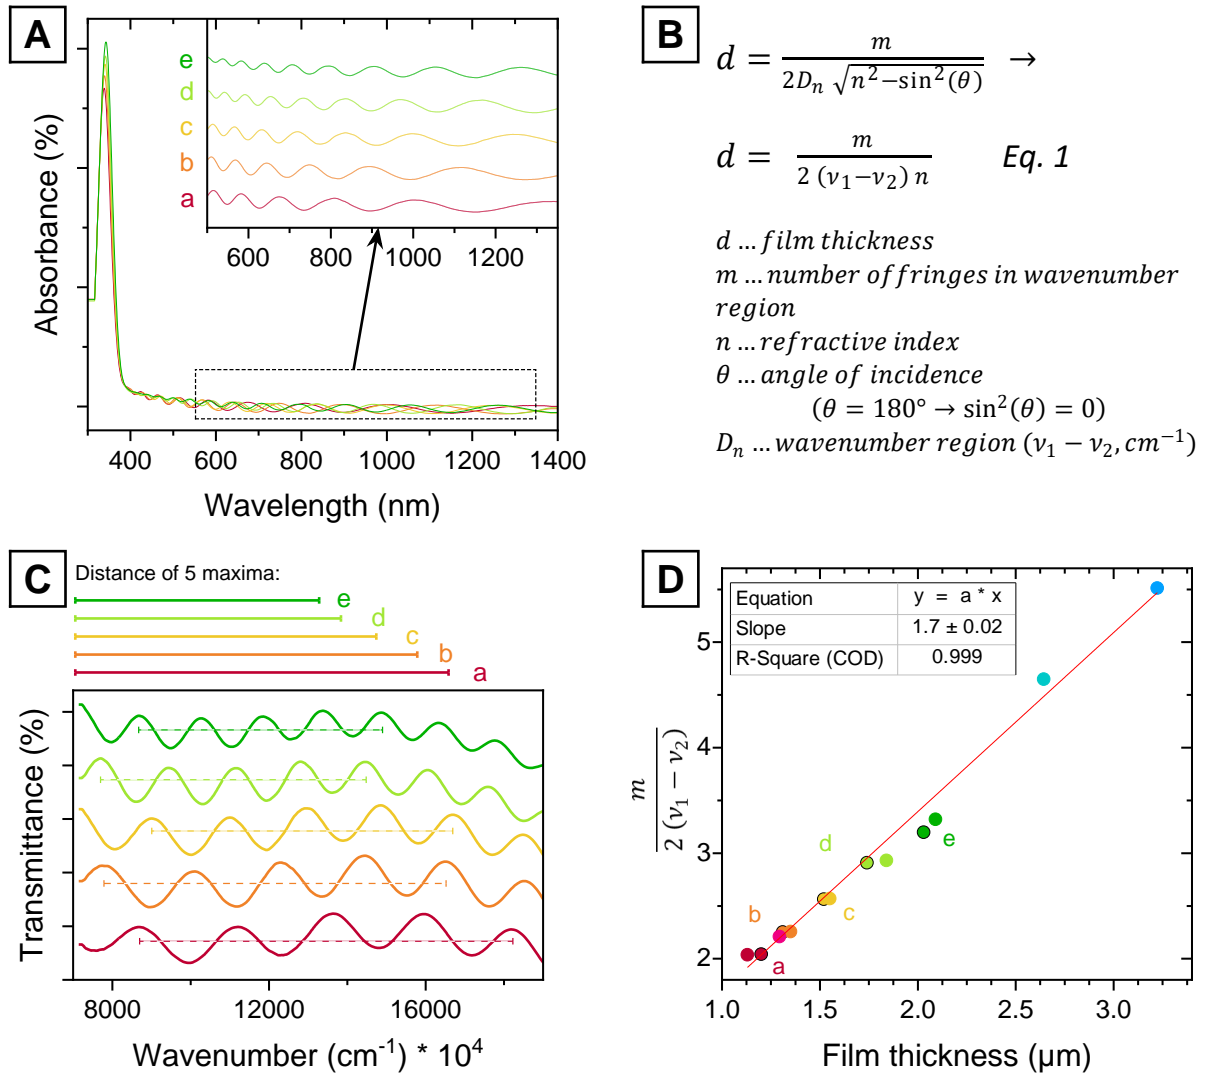

**Figure S5** Film thickness determination of mesoporous titania thin films via UV-Vis and profilometry. The thickness of titania samples was varied by adjusting the spin coating speed and the number of layers. (A) Absorbance of 5 titania thin films with different film thicknesses (film thickness:  $a < b < c < d < e$ ). Inset: Magnification of the region between 500 and 1300 nm showing the interference fringes resulting from a partially reflecting thin film on a reflecting substrate. (B) Equation giving the correlation between film thickness and refractive index.<sup>1</sup> (C) Transmittance vs wavenumber in the interference fringe region. (D) Film thickness (determined by profilometry) vs values calculated from eq. 1, showing a good linear correlation and yielding a refractive index of 1.7, which falls within the range of refractive indices reported for mesoporous titania (1.6 – 2.9).<sup>2,3</sup>

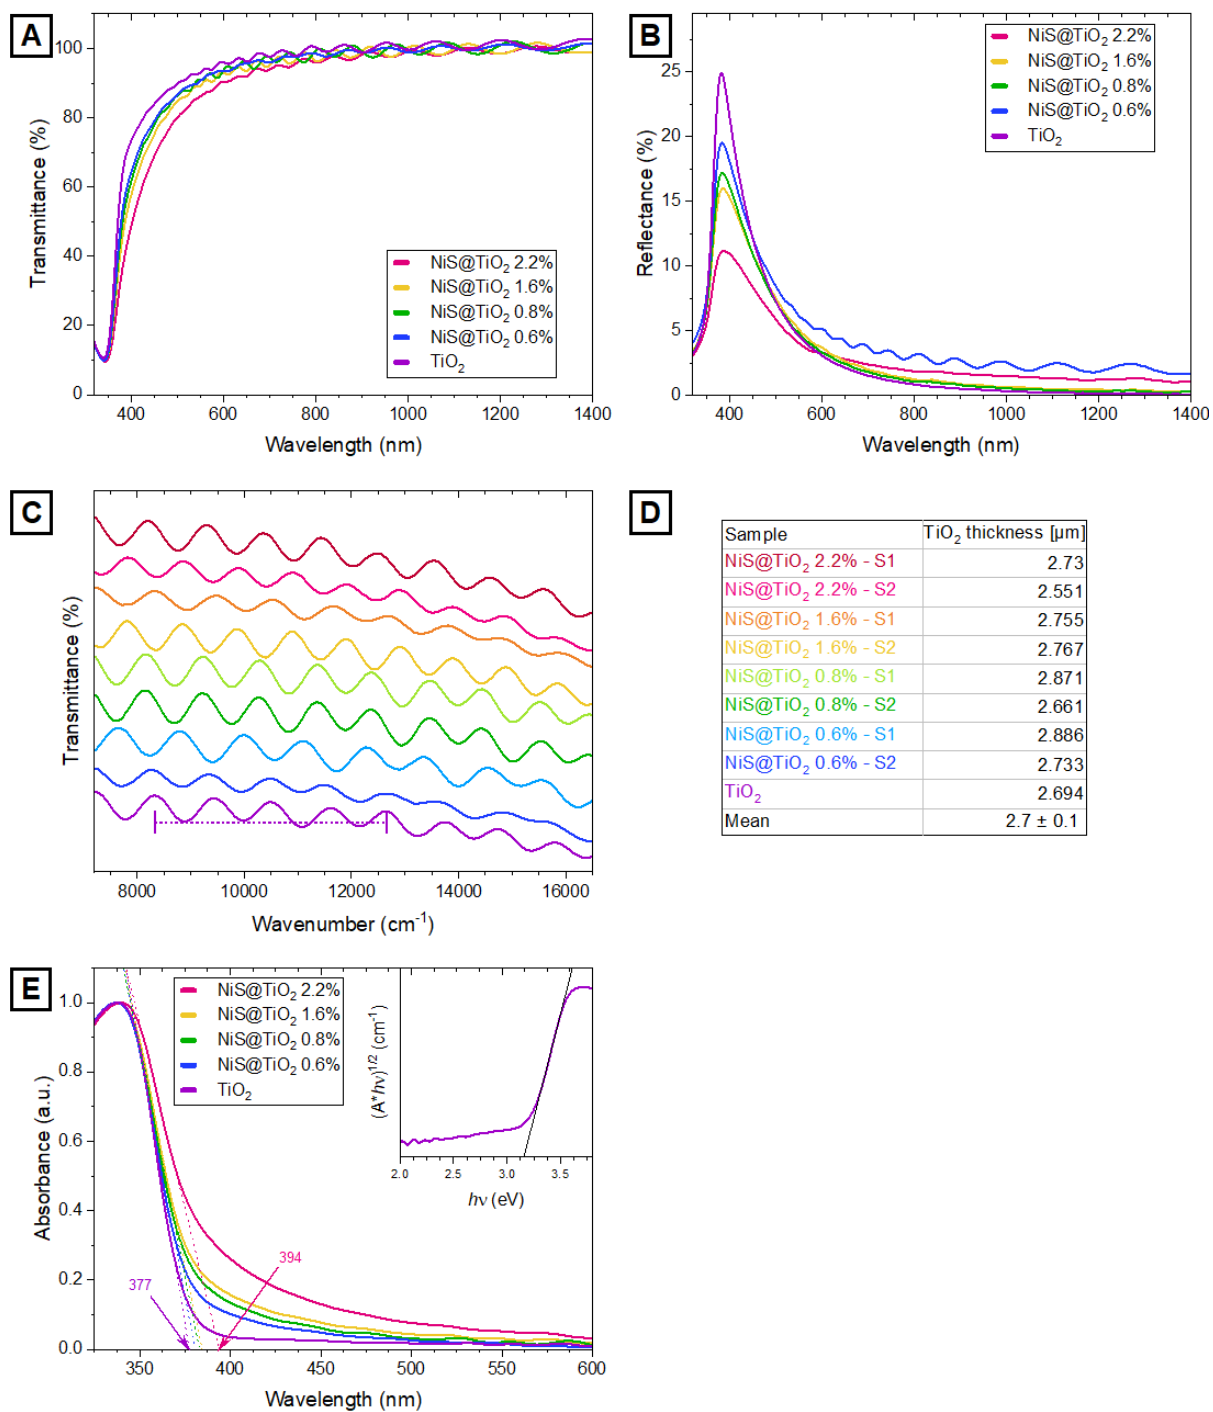

**Figure S6** Determination of the thickness of the titania film for the NiS-modified thin film titania samples by UV-Vis. (A) Transmittance and (B) diffuse reflectance spectra of NiS@TiO<sub>2</sub> thin films modified with four different amounts of NiS (c1 – pink, 2.2  $\pm$  0.7 w%, c2 – yellow, 1.8  $\pm$  0.6 w%, c3 – green, 0.8  $\pm$  0.1 w%; c4 – blue, 0.6  $\pm$  0.3 w%; purple: pure titania). (C) Transmittance vs wavenumber in the titania/glass interference fringe region. (D) Titania film thickness values calculated from the distance of the interference maxima, with a mean value of 2.74  $\pm$  0.1  $\mu\text{m}$ . (E) Normalized UV-Vis absorption spectra of NiS@TiO<sub>2</sub> thin films modified with different amounts of NiS. Inset: Tauc plot of the pristine titania film.

## Determination of the NiS amount:

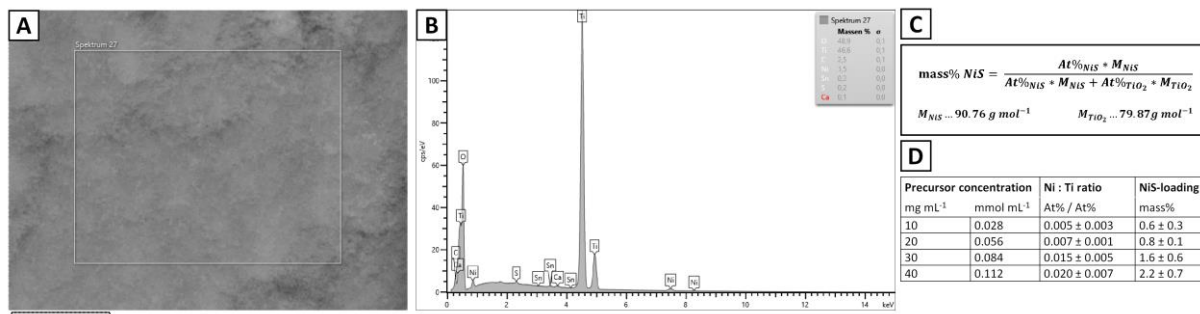

**Figure S7** Estimation of NiS amount on TiO<sub>2</sub> thin film catalyst using SEM-EDS: (A) SEM image and (B) corresponding EDS spectrum of a NiS@TiO<sub>2</sub> sample (precursor concentration: 0.112 mmol mL<sup>-1</sup>). (C) Calculation of the NiS loading from the atomic percentages of Ni and Ti obtained by EDS. (D) Calculated NiS loadings for the precursor concentrations 0.028, 0.056, 0.084 and 0.112 mmol mL<sup>-1</sup>. For each sample, the loading was calculated as the average of three EDS measurements.

## Hydrogen evolution reaction (HER)

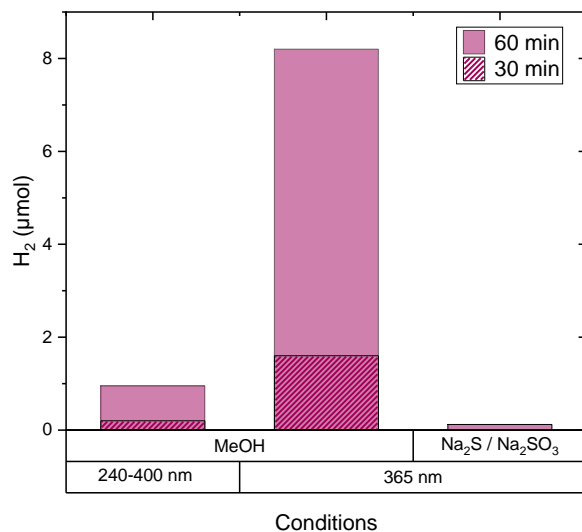

**Figure S8** Evaluation of conditions for the hydrogen evolution reaction by varying light source, sacrificial reagent, and experiment time. Final experimental conditions: 240-400 nm light source, 50 v% MeOH, 60 minutes.

**Table S1** Concentrations of precursor solutions for the preparation of the catalysts for the HER experiments.

| Cocatalyst    | Precursor solution (mg mL <sup>-1</sup> ) | Precursor solution (mmol mL <sup>-1</sup> ) | NiS:TiO <sub>2</sub> <sup>°</sup> (mass%) | H <sub>2</sub> evolution (mmol h <sup>-1</sup> g <sup>-1</sup> ) |
|---------------|-------------------------------------------|---------------------------------------------|-------------------------------------------|------------------------------------------------------------------|
| No cocatalyst |                                           |                                             |                                           | 0.01                                                             |
| NiS (NiXaC4b) | 5                                         | 0.014                                       |                                           | 1.09                                                             |
| NiS (NiXaC4b) | 10                                        | 0.028                                       | 0.6 ± 0.3                                 | 0.89                                                             |
| NiS (NiXaC4b) | 20                                        | 0.056                                       | 0.8 ± 0.1                                 | 2.35                                                             |
| NiS (NiXaC4b) | 30                                        | 0.084                                       | 1.6 ± 0.6                                 | 2.27                                                             |
| NiS (NiXaC4b) | <b>40</b>                                 | <b>0.112</b>                                | <b>2.2 ± 0.7</b>                          | <b>2.78</b>                                                      |
| NiS (NiXaC4b) | 60                                        | 0.168                                       |                                           | 1.75                                                             |
| NiS (NiXaC4b) | 60 (2 x coated)                           | Nominal precursor concentration: 0.336      |                                           | 0.67                                                             |
| NiS (NiXaC2)  | 25                                        | 0.084                                       |                                           | 2.00                                                             |
| NiS (NiXaC3)  | 28                                        | 0.084                                       |                                           | 2.02                                                             |
| NiS (NiXaC3b) | 28                                        | 0.084                                       |                                           | 1.58                                                             |
| NiS (NiXaC5)  | 32                                        | 0.084                                       |                                           | 1.81                                                             |
| NiS (NiXaC5b) | 32                                        | 0.084                                       |                                           | 2.28                                                             |

<sup>°</sup>Calculated from Ni:Ti (atom% : atom%) ratio determined via SEM-EDX (Figure S7)

The following HER measurements (Figure S9) were conducted in the process of manuscript revisions. By this point, we have optimized the cocatalyst deposition process by using longer infiltration times (10 s) and a higher solution volume to avoid higher cocatalyst concentrations on the surface. Also, the new batch of samples had an approximately 10% thicker titania layer. Therefore, we measured higher efficiencies for this batch.

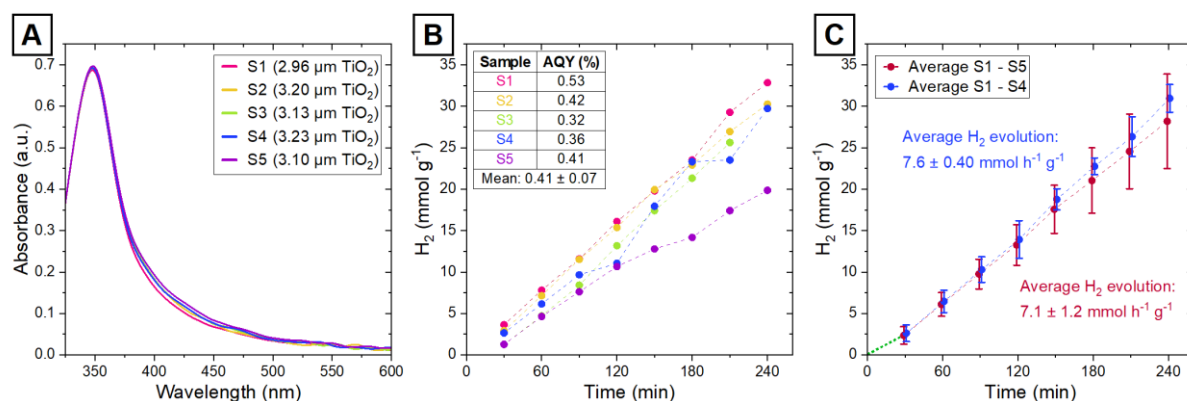

**Figure S9** Multiple 4-h measurements of NiS@TiO<sub>2</sub> films with the best-performing cocatalyst loading (NiXaC4b precursor, 110 μmol mL<sup>-1</sup>). (A) Absorption spectra for the five NiS@TiO<sub>2</sub> catalyst thin films, with the thickness of the titania calculated from the interference pattern. (B) HER measurements over four hours. For S3 (green), the last measurement point was excluded due to an instrumentation error. AQY values for each sample and the mean AQY (0.41 %) are given in the inset. (C) Hydrogen evolution averaged over all samples (red, 7.1 ± 1.2 mmol h<sup>-1</sup> g<sup>-1</sup>) and with the lowest-performing sample S5 (purple) excluded (blue, 7.6 ± 0.40 mmol h<sup>-1</sup> g<sup>-1</sup>). In the first 30 minutes, the hydrogen evolution rate was lower than the average (marked with a green dotted line). After that, the rate was approximately stable for the duration of the experiments. The overall experiment standard deviation for the average of S1-S4 was calculated as 14.5%.

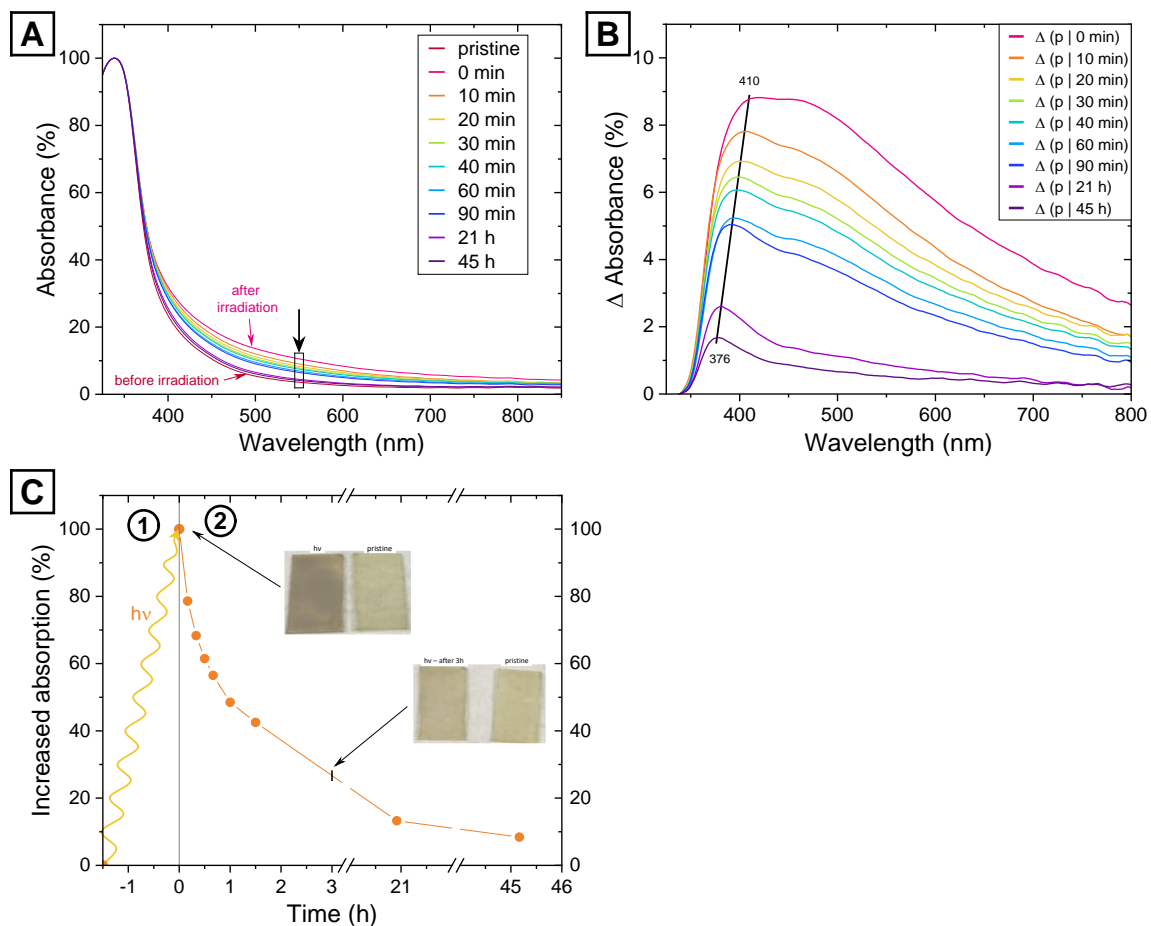

**Figure S10** Reversible discoloration of the NIS@TiO<sub>2</sub> catalyst upon irradiation in 50 % MeOH (aq.). (A): UV-Vis Measurements of the catalyst before (pristine) irradiation, after 90 minutes with a Hg-vapor lamp at 2.5 W cm<sup>-1</sup>, and at different times after irradiation. (B) Difference spectra: absorbance of the film at different times after irradiation (indicated with the time of measurement) – absorbance of the pristine film (indicated with p). (C) Increased absorption of the irradiated film compared to the pristine film (averaged over the wavelength range 545-555 nm). (1) 1 hour Illumination of the NIS@TiO<sub>2</sub> catalyst with a Mercury vapor lamp at 2.5 W cm<sup>-1</sup> in 50 % aq. MeOH. (2) Decrease of the absorbance and pictures of the discolored film directly and 3 hours after illumination in comparison to a not illuminated film.

### Cyclic voltammetry (CV)

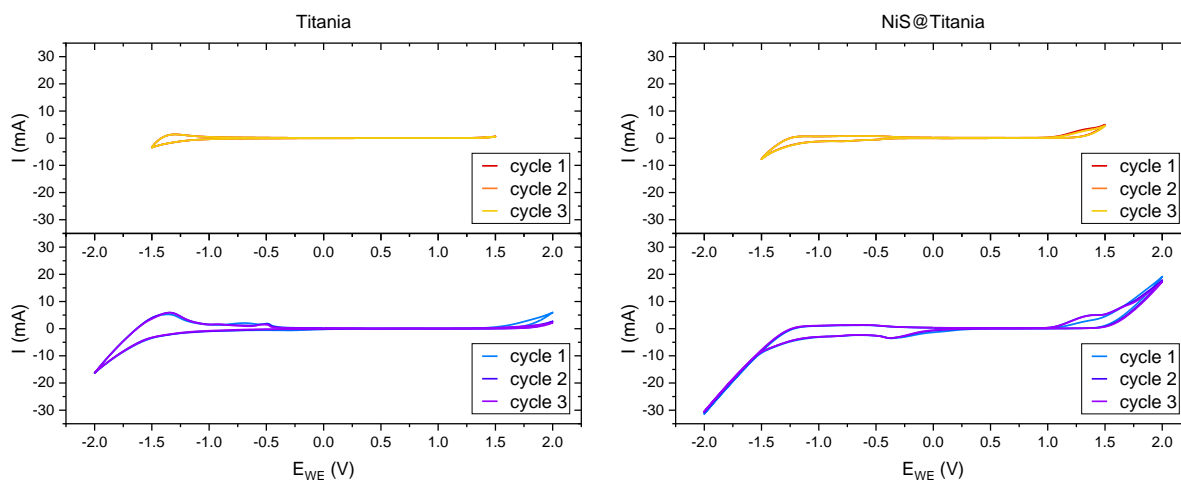

**Figure S11** Cyclic voltammetry measurements of titania and Nis@TiO<sub>2</sub> films on FTO coated glass substrates. 1 M NaCl was used as electrolyte and purged for 10 minutes with nitrogen. The CV experiments were conducted with a scan rate of

50  $\text{mV s}^{-1}$  between 1.5 and -1.5 V (upper row, red-yellow) and 2 and -2 V (lower row, blue-purple). No chemically irreversible change is observable in those regions.

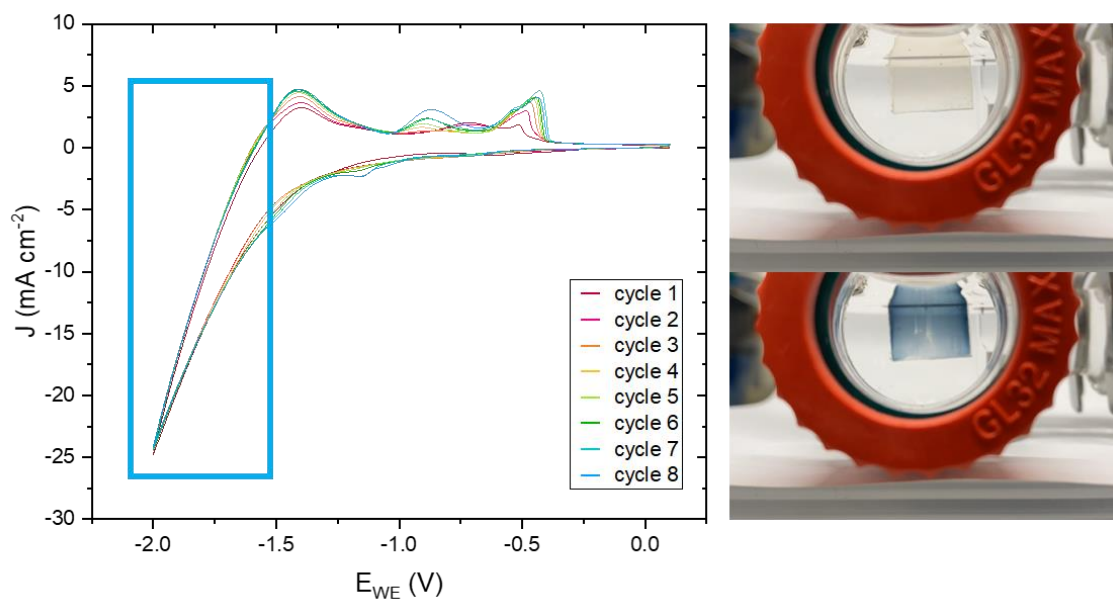

**Figure S12** Cyclic voltammetry measurements of a  $\text{TiO}_2$  film on FTO coated glass substrates. 1 M NaCl was used as electrolyte and purged for 10 minutes with nitrogen. For the experiment, a scan rate of  $50 \text{ mV s}^{-1}$  was used between 2 and -2 V for 8 cycles. The current density was calculated from the area of the film submerged in the electrolyte. Between -1.6 and -2 V a discoloration to a strong blue was observed, which completely disappeared again upon applying a more positive potential. This reversible discoloration can be attributed to self-doping of titania by the formation of  $\text{Ti}^{3+}$ .<sup>4</sup>

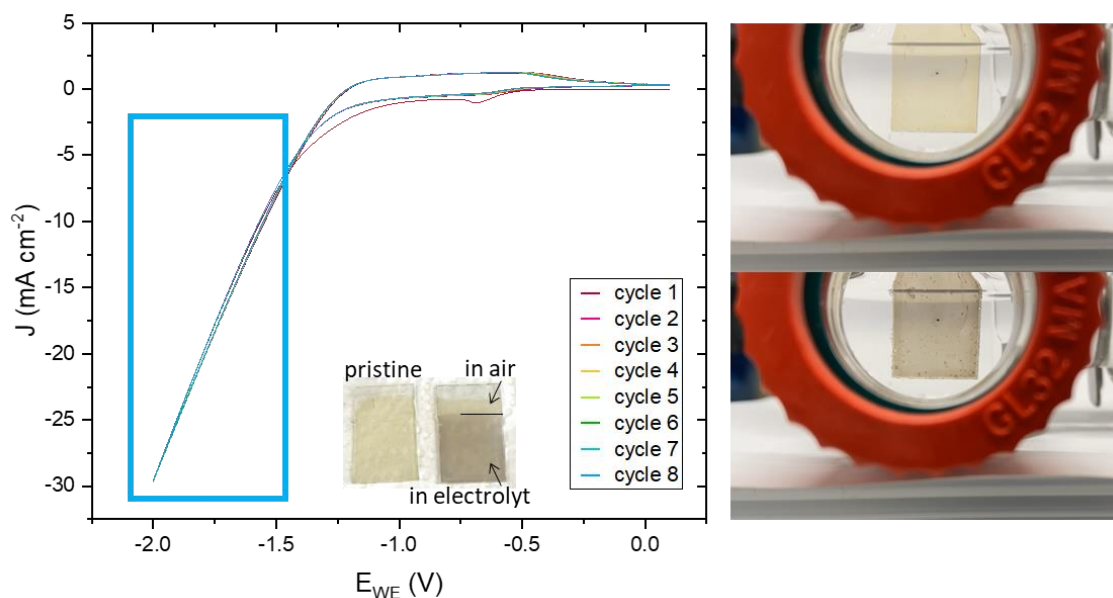

**Figure S13** Cyclic voltammetry measurements of a  $\text{NiS@TiO}_2$  film on FTO coated glass substrates. 1 M NaCl was used as electrolyte and purged for 10 minutes with nitrogen. For the experiment, a scan rate of  $50 \text{ mV s}^{-1}$  was used between 2 and -2 V for 8 cycles. The current density was calculated from the area of the film submerged in the electrolyte. Between -1.5 and -2 V a slight darkening of the film followed by the evolution of gas bubbles was observed. The discoloration returned to the previous color again upon applying a more positive potential. No degradation could be observed during the duration of the experiment.

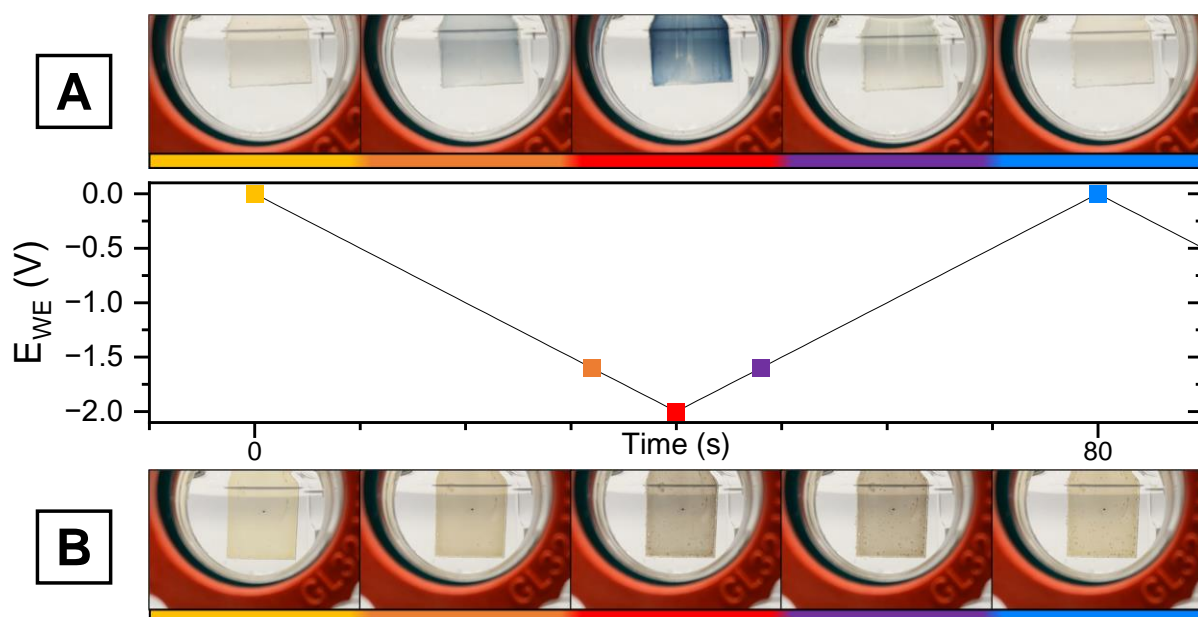

**Figure S14** Color change of the thin films during the CV measurements, with the video snapshots corresponding to the applied voltage indicated by color. (A):  $\text{TiO}_2$ . Yellow: 0 V, start of the measurement. Orange: approximately -1.6 V, slight discoloration to light blue. Red: -2 V, bright blue color. Purple: approximately -1.6 V, reversal of the color change to slight discoloration. Blue: 0 V, color changed back to visibly indistinguishable from the start. (B)  $\text{NiS@TiO}_2$ : Yellow: 0V, start of the measurement. Orange: approximately -1.6 V, slight darkening of the film. Red: -2 V, discoloration to brown and strong bubble evolution. Purple: approximately -1.6 V, thin film lightens again. Blue: 0 V, thin film color remains slightly darker than prior to the measurement.

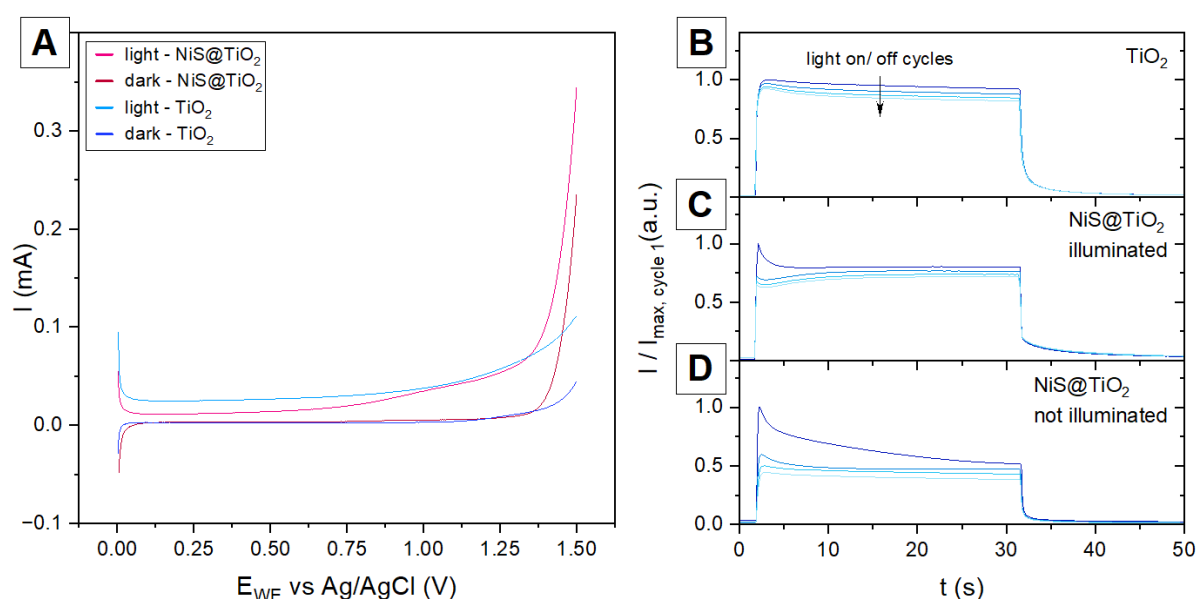

**Figure S15** Photoelectrochemical characterizations of  $\text{TiO}_2$  and  $\text{NiS@TiO}_2$  in 1 M  $\text{NaSO}_4$ . (A) Linear sweep voltammetry from 0 to 1.5 V in dark conditions and under illumination. (B) Manual light-on-off transients for  $\text{TiO}_2$ ,  $\text{NiS@TiO}_2$  (preconditioned by illumination in 50 % MeOH) and  $\text{NiS@TiO}_2$ . For each sample the first four light-on-off cycles are given normalized by the maximum current of the first illumination cycle (dark blue).

For the photoelectrochemical investigations given in Figure S15, some sample was scraped off the thin film catalysts, dispersed in 1 w% aqueous Nafion solution, drop coated onto FTO and dried at  $50^\circ\text{C}$ . The light-on-off transients for  $\text{TiO}_2$  (Figure S15B),  $\text{NiS@TiO}_2$  (Figure S15C, preconditioned by one hour illumination submerged in 50 % MeOH) and pristine  $\text{NiS@TiO}_2$  (Figure S15D) are given in Figure 15B. For  $\text{TiO}_2$ , there is no current “spike” observed upon start of illumination under the applied conditions,

but rather a slightly rounded rise, which might be caused by slow charge transport. This is followed by a slight decrease of the current over time caused by charge carrier recombination. In contrast, for the NiS@TiO<sub>2</sub> samples a pronounced current spike is observed in the first cycle, which decreases in intensity in the following cycles (Figure S15D). We suggest that the decrease and disappearing of this spike can be attributed to some kind of surface conditioning occurring in the catalyst. For the NiS@TiO<sub>2</sub> sample preconditioned by illumination, the difference between the first and second illumination cycle is much lower, and no spike is visible after the first cycle.

## X-ray photoelectron spectroscopy (XPS)

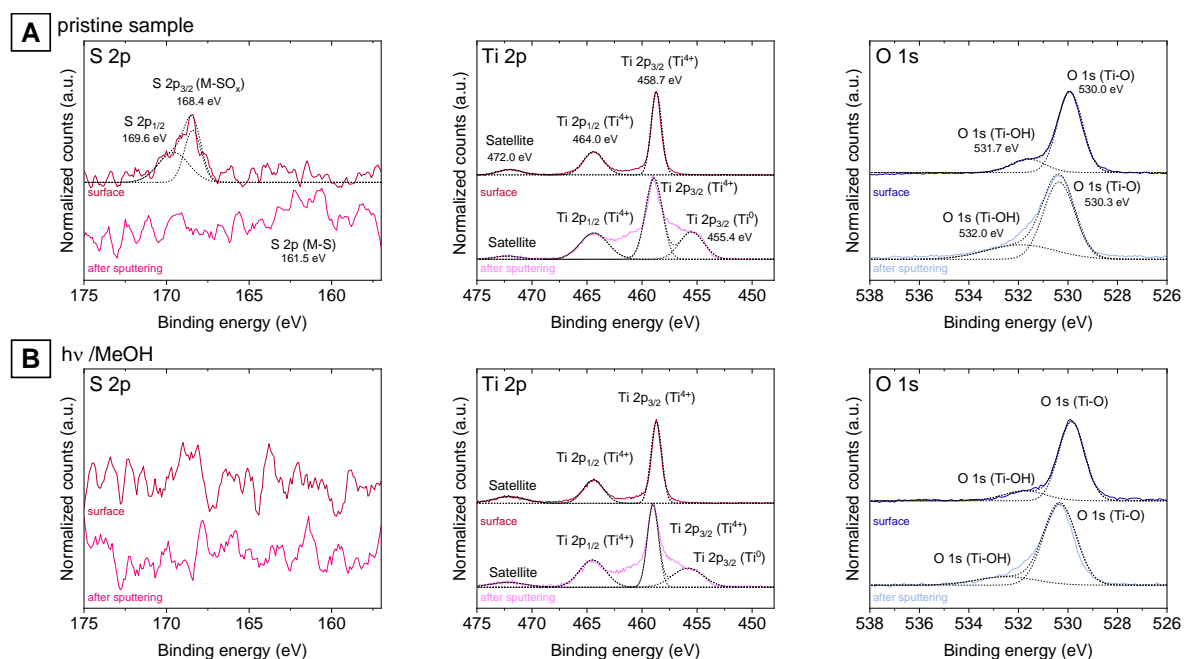

**Figure S16** XPS data of (A) an untreated NiS@TiO<sub>2</sub> film and (B) a NiS@TiO<sub>2</sub> film after UV illumination in water/MeOH solution, both films were prepared on a glass/FTO support. For both samples, spectra before and after sputtering of the sample surface are shown. For the S 2p spectra, the surface measurement shows a signal corresponding to a metal sulfate species (approx. 168.5 eV). The asymmetric peak shape is a result of the resolution not being sufficient to resolve the closely spaced (1.16 eV) S 2p<sub>3/2</sub> and S 2p<sub>1/2</sub> spin-orbit components. After sputtering, this peak disappears and a low signal for the metal sulfide species emerges (approx. 162 eV).<sup>5</sup> For the Ti 2p spectra, the surface measurements shows the two symmetrical Ti 2p<sub>3/2</sub> and Ti 2p<sub>1/2</sub> peaks at 458.7 and 464.4 eV, respectively. The splitting value of 5.7 eV between the spin-orbit components is characteristic for TiO<sub>2</sub>. In the measurement after sputtering an additional signal at a lower energy can be observed, which can be attributed to metallic Ti formed during the sputtering.<sup>6</sup> In the O 1s spectra, next to the main signal corresponding to Ti-O, a small peak at a slightly higher energy is visible, which can be assigned to hydroxylated TiO<sub>2</sub>.<sup>7</sup>

**Table S2** Comparison of hydrogen evolution rates for different NiS@TiO<sub>2</sub>, metal sulfide@TiO<sub>2</sub> / suspension, and metal sulfide@TiO<sub>2</sub> / thin film systems.

| Photocatalyst system            |                                                           | Sacrificial reagent                                                 | Light source           | H <sub>2</sub> production<br>[mmol h <sup>-1</sup> g <sup>-1</sup> ] | Year           | Reference                           | AQE                       |      |
|---------------------------------|-----------------------------------------------------------|---------------------------------------------------------------------|------------------------|----------------------------------------------------------------------|----------------|-------------------------------------|---------------------------|------|
| Thin film (TF) / suspension (S) |                                                           |                                                                     |                        |                                                                      |                |                                     |                           |      |
| NiS@TiO <sub>2</sub>            | NiS@TiO <sub>2</sub>                                      | TF                                                                  | 50 % (v/v) MeOH aq.    | 365 nm                                                               | 3.3            | 2025                                | This work                 | 0.41 |
|                                 | NiS@TiO <sub>2</sub>                                      | S                                                                   | 30 % (v/v) lactic acid | 300 W Xe lamp                                                        | 0.648          | 2012                                | Zhang et al. <sup>8</sup> | n.m. |
|                                 | NiS@TiO <sub>2</sub>                                      | S                                                                   | 50 % (v/v) MeOH aq.    | 500 W Xe lamp                                                        | 7 <sup>◊</sup> | 2014                                | Wang et al. <sup>9</sup>  | n.m. |
|                                 | NiS@TiO <sub>2</sub>                                      | S                                                                   | 20 % (v/v) MeOH aq.    | 350 W Xe lamp                                                        | 0.655          | 2018                                | Xu et al. <sup>10</sup>   | n.m. |
| Suspension systems              | Pt@TiO <sub>2</sub>                                       | 25 % (v/v) EtOH aq.                                                 | 350 W Xe lamp          | 16.7 <sup>◊◊</sup>                                                   | 2010           | Yu et al. <sup>11</sup>             | n.m.                      |      |
|                                 | CdS@TiO <sub>2</sub>                                      | 0.1 M Na <sub>2</sub> S/ 0.1 Na <sub>2</sub> SO <sub>4</sub>        | 300 W Xe lamp          | 4.65                                                                 | 2019           | Wu et al. <sup>12</sup>             | n.m.                      |      |
|                                 | CdS@TiO <sub>2</sub> /Ni <sub>2</sub> P                   |                                                                     |                        | 7.42                                                                 |                |                                     | n.m.                      |      |
|                                 | Pd@TiO <sub>2</sub>                                       | 25 % (v/v) MeOH aq.                                                 | Direct sunlight        | 35 <sup>•</sup>                                                      | 2019           | Nalajala et al. <sup>13</sup>       | 0.31                      |      |
|                                 | MoS <sub>2</sub> @TiO <sub>2</sub>                        | 20 % (v/v) MeOH aq.                                                 | 365 nm                 | 2.443                                                                | 2019           | Wang et al. <sup>14</sup>           | n.m.                      |      |
|                                 | Pt@TiO <sub>2</sub> NTs                                   | 5 % (v/v) glycerol aq.                                              | Direct sunlight        | 173                                                                  | 2019           | Lakshmanareddy et al. <sup>15</sup> | n.m.                      |      |
|                                 | CoP <sub>x</sub> @TiO <sub>2</sub>                        | 20 % (v/v) MeOH aq.                                                 | 300 W Xe lamp          | 0.824                                                                | 2021           | Liang et al. <sup>16</sup>          | 0.7                       |      |
|                                 | CoS <sub>2</sub> @TiO <sub>2</sub>                        | 25 % (v/v) MeOH / simulated sea water                               | 300 W Xe lamp          | 9.87                                                                 | 2024           | Shanmugaratnam et al. <sup>17</sup> | n.m.                      |      |
|                                 | NiS <sub>2</sub> @TiO <sub>2</sub>                        |                                                                     |                        | 12.47                                                                |                |                                     | n.m.                      |      |
|                                 | SnS <sub>2</sub> @TiO <sub>2</sub>                        |                                                                     |                        | 2.51                                                                 |                |                                     | n.m.                      |      |
| Thin film systems               | MoS <sub>2</sub> @TiO <sub>2</sub>                        | 20 % (v/v) MeOH aq.                                                 | 300 W Xe lamp          | 580 <sup>**</sup>                                                    | 2018           | Guo et al. <sup>18</sup>            | n.m.                      |      |
|                                 | Pd@TiO <sub>2</sub>                                       | 25 % (v/v) MeOH aq.                                                 | Direct sunlight        | 104                                                                  | 2019           | Nalajala et al. <sup>13</sup>       | 0.96                      |      |
|                                 | Cu-Ni(1:1)@TiO <sub>2</sub>                               | 25 % (v/v) MeOH aq.                                                 | 300 W Xe lamp          | 41.7                                                                 | 2020           | Tudu et al. <sup>19</sup>           | 0.39                      |      |
|                                 | Pt@TiO <sub>2</sub>                                       | 50 % (v/v) MeOH aq.                                                 | 13 W UV lamp           | 0.3496                                                               | 2023           | Mendez et al. <sup>20</sup>         | n.m.                      |      |
|                                 | MoP/CdS@TiO <sub>2</sub>                                  | 10 % (v/v) lactic acid                                              | 300 W Xe lamp          | 35.5                                                                 | 2024           | Wang et al. <sup>21</sup>           | n.m.                      |      |
|                                 | Pt@TiO <sub>2</sub> /PHBH <sup>□</sup>                    | 10 % (v/v) EtOH aq.                                                 | 365 nm                 | 90 <sup>□</sup>                                                      | 2024           | Tasbihi et al. <sup>22</sup>        | n.m.                      |      |
|                                 | CdS@TiO <sub>2</sub> (anatase) @TiO <sub>2</sub> (rutile) | 0.25 M Na <sub>2</sub> S/<br>0.35 M Na <sub>2</sub> SO <sub>3</sub> | Direct sunlight        | 57.95 <sup>□□</sup>                                                  | 2026           | Banerjee et al. <sup>23</sup>       | 2.32                      |      |

<sup>◊</sup> reported as 350 μmol h<sup>-1</sup> for 50 mg catalyst

<sup>◊◊</sup> reported as 333.5 μmol h<sup>-1</sup> for 20 mg catalyst

<sup>•</sup> read out from the figure + reported as a third of the thin-film efficiency

<sup>\*\*</sup> reported normalized to the mass of MoS<sub>2</sub> (30.6 μg cm<sup>-2</sup>), activity normalized to the mass of total catalyst (MoS<sub>2</sub>@TiO<sub>2</sub>) was not stated

<sup>□</sup> PHBH: poly(hydroxybutyrate-co-hydroxyhexanoate) for immobilization of TiO<sub>2</sub>

<sup>□□</sup> reported as 57.95 μmol h<sup>-1</sup> for 1 mg catalyst

**Table S3** Prices of different metals for 24.10.2025

| Metal            | Price [\$]    | Price [€ kg <sup>-1</sup> ] |
|------------------|---------------|-----------------------------|
| Ni <sup>24</sup> | 15323.9 / ton | 13.0                        |
| Pd <sup>25</sup> | 1463.7 / oz   | 39 844                      |
| Pt <sup>26</sup> | 1593.7 / oz   | 43 383                      |

## References

- 1 A. R. Hind and L. Chomette, *The determination of thin film thickness using reflectance spectroscopy (Publication Number SI-A-1205)*, Agilent Technologies Inc., 2011.
- 2 P. Karasiński, E. Gondek, S. Drewniak and I. V. Kityk, *J. Sol-Gel Sci. Technol.*, 2012, **61**, 355–361.
- 3 K. R. Phillips, T. Shirman, M. Aizenberg, G. T. England, N. Vogel and J. Aizenberg, *J. Mater. Chem. C*, 2020, **8**, 109–116.
- 4 G. Yin, X. Huang, T. Chen, W. Zhao, Q. Bi, J. Xu, Y. Han and F. Huang, *ACS Catal.*, 2018, **8**, 1009–1017.
- 5 M. Lu, N. Gao, X.-J. Zhang and G.-S. Wang, *RSC Adv.*, 2019, **9**, 5550–5556.
- 6 P. Bargiela, V. Fernandez, D. Morgan, M. Richard-Plouet, N. Fairley and J. Baltrusaitis, *Results Surf. Interfaces*, 2024, **15**, 100231.
- 7 C. Fan, C. Chen, J. Wang, X. Fu, Z. Ren, G. Qian and Z. Wang, *Sci. Rep.*, 2015, **5**, 11712.
- 8 L. Zhang, B. Tian, F. Chen and J. Zhang, *Int. J. Hydrogen Energy*, 2012, **37**, 17060–17067.
- 9 Q. Wang, G. Yun, Y. Bai, N. An, Y. Chen, R. Wang, Z. Lei and W. Shangguan, *Int. J. Hydrogen Energy*, 2014, **39**, 13421–13428.
- 10 F. Xu, L. Zhang, B. Cheng and J. Yu, *ACS Sustain. Chem. Eng.*, 2018, **6**, 12291–12298.
- 11 J. Yu, L. Qi and M. Jaroniec, *J. Phys. Chem. C*, 2010, **114**, 13118–13125.
- 12 K. Wu, P. Wu, J. Zhu, C. Liu, X. Dong, J. Wu, G. Meng, K. Xu, J. Hou, Z. Liu and X. Guo, *Chemical Engineering Journal*, 2019, **360**, 221–230.
- 13 N. Nalajala, K. K. Patra, P. A. Bharad and C. S. Gopinath, *RSC Adv.*, 2019, **9**, 6094–6100.
- 14 W. Wang, S. Zhu, Y. Cao, Y. Tao, X. Li, D. Pan, D. L. Phillips, D. Zhang, M. Chen, G. Li and H. Li, *Adv. Funct. Materials.*, 2019, **29**, 1901958.
- 15 N. Lakshmanareddy, V. Navakoteswara Rao, K. K. Cheralathan, E. P. Subramaniam and M. V. Shankar, *Journal of Colloid and Interface Science*, 2019, **538**, 83–98.
- 16 R. Liang, Y. Wang, C. Qin, X. Chen, Z. Ye and L. Zhu, *Langmuir*, 2021, **37**, 3321–3330.
- 17 S. Shanmugaratnam, P. Ravirajan, Y. Shivatharsiny and D. Velauthapillai, *Int. J. Hydrogen Energy*, 2024, **91**, 673–682.
- 18 L. Guo, Z. Yang, K. Marcus, Z. Li, B. Luo, L. Zhou, X. Wang, Y. Du and Y. Yang, *Energy Environ. Sci.*, 2018, **11**, 106–114.
- 19 B. Tudu, N. Nalajala, P. Saikia and C. S. Gopinath, *Solar RRL*, 2020, **4**, 1900557.
- 20 F. J. Méndez, D. Barrón-Romero, O. Pérez, R. D. Flores-Cruz, Y. Rojas-Challa and J. A. García-Macedo, *Materials Chemistry and Physics*, 2023, **305**, 127925.
- 21 J. Wang, J. Tian, P. Han, L. Song, W. Wang, K. Lin, D. Feng and B. Ma, *Langmuir*, 2024, **40**, 21161–21170.
- 22 M. Tasbihi, S. Kwon, B. Kim, D. Brüggemann, H. Hou, J. Lu, R. Amitrano, T. Grimm, J. García-Antón, P. Strasser, S. L. Riedel and M. Schwarze, *Langmuir*, 2024, **40**, 25800–25810.
- 23 N. Banerjee, A. Roy and R. G. Nair, *Fuel*, 2026, **406**, 136920.
- 24 Trading Economics, Nickel, <https://tradingeconomics.com/commodity/nickel>, (accessed October 24, 2025).
- 25 Trading Economics, Palladium, <https://tradingeconomics.com/commodity/palladium>, (accessed February 4, 2026).
- 26 Trading Economics, Platinum, <https://tradingeconomics.com/commodity/platinum>, (accessed October 24, 2025).
